# Supplementary material
Source: Springer Nature journal article supplement (https://www.springermedizin.de/resource/supplementary/12936_2013_3036_MOESM4_ESM.pdf/9544902)

**Plot of reference mean against the ratio of Standard Deviation and Participant's mean**

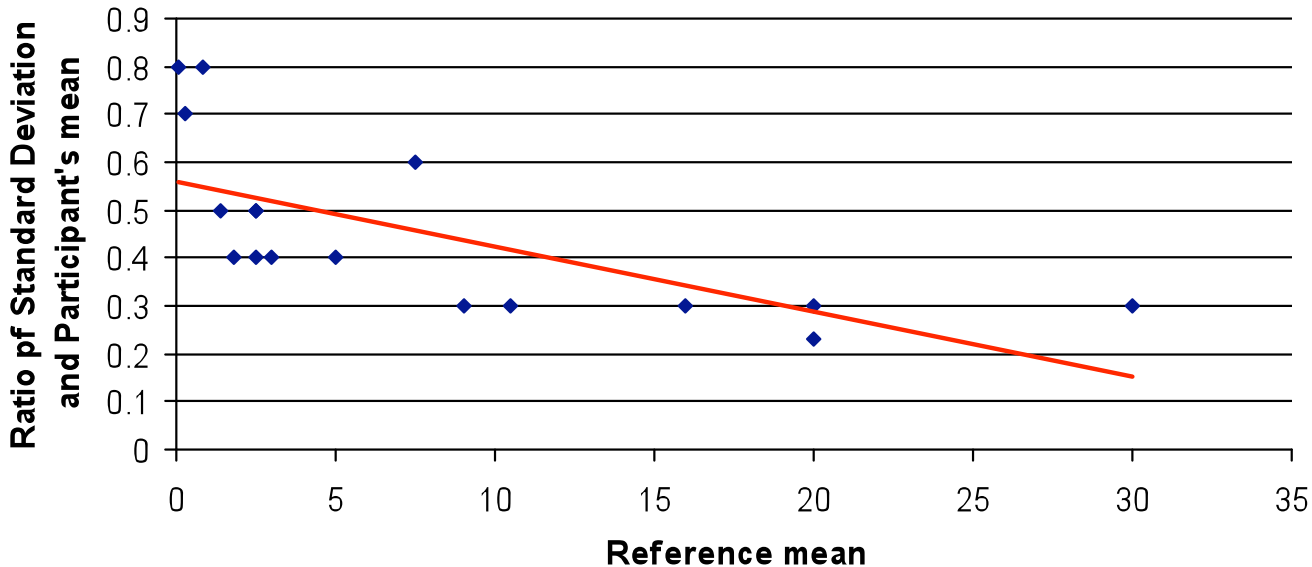

Supplement: MOESM4 [file 9544902]
